# Supplementary material for: Impact of Reperfusion on Plasma Oxylipins in ST-Segment Elevation Myocardial Infarction
Source: MDPI journal article supplement (doi:10.3390/metabo14010019), 2023-12-27
Supplement: s1 [file s1]

## **Impact of reperfusion on plasma oxylipins in ST-segment Elevation Myocardial Infarction**

**Zahra Solati<sup>1,2</sup>, Arun Surendran<sup>1,2</sup>, Harold M Aukema<sup>1,3,4</sup>, and Amir Ravandi<sup>1,2,5</sup>**

<sup>1</sup>Precision Cardiovascular Medicine Group; St. Boniface Hospital, Albrechtsen Research Centre,

<sup>2</sup>Department of Physiology and Pathophysiology, Rady Faculty of Health Sciences, University of Manitoba

<sup>3</sup>Department of Food and Human Nutritional Sciences, University of Manitoba

<sup>4</sup>Canadian Centre for Agri-Food Research in Health and Medicine, St. Boniface Hospital Research Centre, Winnipeg, Canada.

<sup>5</sup> Section of Cardiology, University of Manitoba, Winnipeg, Canada.

### **Corresponding author & Lead Contact**

Dr. Amir Ravandi MD PhD FRCPC

Interventional Cardiology

Cardiovascular Lipidomics Laboratory,

St. Boniface Hospital,

409 Tache Ave,

Winnipeg, MB Canada R2H 2A6

Phone.204-235-3206 and 204-235-3414

Fax.204-235-0793 and 204-235-0793

Email: aravandi@sbgh.mb.ca

**Table S1: List of oxylipin compounds that were quantified in plasma of by reversed-phase HPLC-MS/MS**

| Analyte          | Pathway     | Fatty Acid | Q1 Mass (Da) | Q3 Mass (da) | Internal standard name | Retention time (min) | Response factor | LLOD in 100ul (ng/ul) | ULOD in 100ul (ng/ul) |
|------------------|-------------|------------|--------------|--------------|------------------------|----------------------|-----------------|-----------------------|-----------------------|
| PGD2             | COX         | AA         | 351          | 271          | (d4) PGD2.IS           | 7.91                 | 2.28045         | 0.003                 | 22.22                 |
| PGE2             | COX         | AA         | 351          | 271          | (d4) PGE2.IS           | 7.59                 | 8.68273         | 0.003                 | 22.22                 |
| 5-HETE           | LOX         | AA         | 319          | 115          | (d8) 5-HETE.IS         | 17.13                | 0.90038         | 0.0002                | 22.22                 |
| 5-oxoETE         | LOX         | AA         | 317          | 203          | (d7) 5-oxoETE.IS       | 17.5                 | 1.04473         | 0.0002                | 22.22                 |
| 8-HETE           | LOX         | AA         | 319          | 155          | (d8) 5-HETE.IS         | 16.66                | 1.24638         | 0.0009                | 22.22                 |
| 9-HETE           | LOX         | AA         | 319          | 123          | (d8) 5-HETE.IS         | 16.8                 | 0.29958         | 0.003                 | 22.22                 |
| 11-HETE          | LOX         | AA         | 319          | 167          | (d8) 12-HETE.IS        | 16.39                | 7.67408         | 0.0009                | 22.22                 |
| 12-HETE          | LOX         | AA         | 319          | 135          | (d8) 12-HETE.IS        | 16.56                | 0.15621         | 0.003                 | 22.22                 |
| 12-oxoETE        | LOX         | AA         | 317          | 153          | (d7) 5-oxoETE.IS       | 16.54                | 0.12689         | 0.04                  | 22.22                 |
| tetranor-12-HETE | LOX         | AA         | 265          | 109          | (d8) 12-HETE.IS        | 13.29                | 2.40204         | 0.0002                | 22.22                 |
| 15-HETE          | LOX         | AA         | 319          | 175          | (d8) 15-HETE.IS        | 16.05                | 0.85626         | 0.003                 | 22.22                 |
| 15-oxoETE        | LOX         | AA         | 317          | 113          | (d7) 5-oxoETE.IS       | 16.11                | 3.26434         | 0.0002                | 22.22                 |
| 9-HOTrE          | LOX         | ALA        | 293          | 171          | (d4) 9-HODE.IS         | 14.46                | 1.50163         | 0.003                 | 22.22                 |
| 9-oxoOTrE        | LOX         | ALA        | 291          | 185          | (d7) 5-oxoETE.IS       | 14.96                | 2.2951          | 0.0002                | 22.22                 |
| 13-HOTrE         | LOX         | ALA        | 293          | 195          | (d4) 13-HODE.IS        | 14.6                 | 1.15092         | 0.003                 | 22.22                 |
| 5-HEPE           | LOX         | EPA        | 317          | 115          | (d8) 5-HETE.IS         | 15.79                | 0.68513         | 0.003                 | 22.22                 |
| 12-HEPE          | LOX         | EPA        | 317          | 179          | (d8) 12-HETE.IS        | 15.32                | 1.73582         | 0.003                 | 22.22                 |
| 15-HEPE          | LOX         | EPA        | 317          | 219          | (d8) 15-HETE.IS        | 14.98                | 1.56695         | 0.148                 | 22.22                 |
| 4-HDoHE          | LOX         | DHA        | 343          | 101          | (d8) 5-HETE.IS         | 17.32                | 0.39766         | 0.003                 | 22.22                 |
| 7-HDoHE          | LOX         | DHA        | 343          | 141          | (d8) 5-HETE.IS         | 16.66                | 0.51513         | 0.0009                | 22.22                 |
| 8-HDoHE          | LOX         | DHA        | 343          | 109          | (d8) 5-HETE.IS         | 16.73                | 0.25003         | 0.003                 | 22.22                 |
| 10-HDoHE         | LOX         | DHA        | 343          | 153          | (d8) 12-HETE.IS        | 16.35                | 1.68431         | 0.0002                | 22.22                 |
| 14-HDoHE         | LOX         | DHA        | 343          | 205          | (d8) 15-HETE.IS        | 16.29                | 0.78401         | 0.003                 | 22.22                 |
| 16-HDoHE         | LOX         | DHA        | 343          | 233          | (d8) 15-HETE.IS        | 15.97                | 3.11823         | 0.0009                | 22.22                 |
| 17-HDoHE         | LOX         | DHA        | 343          | 245          | (d8) 15-HETE.IS        | 16.03                | 0.2437          | 0.042                 | 22.22                 |
| 17keto-DHA       | LOX         | DHA        | 341          | 297          | (d7) 5-oxoETE.IS       | 16.28                | 0.11372         | 0.042                 | 22.22                 |
| 11-HDoHE         | LOX/non-enz | DHA        | 343          | 149          | (d8) 12-HETE.IS        | 16.48                | 0.88676         | 0.003                 | 22.22                 |
| 13-HDoHE         | LOX/non-enz | DHA        | 343          | 221          | (d8) 12-HETE.IS        | 16.17                | 0.50603         | 0.003                 | 22.22                 |
| 17-Keto DPA      | LOX         | DPA        | 343          | 247          | (d7) 5-oxoETE.IS       | 16.86                | 0.1154          | 0.012                 | 22.22                 |
| 9-HODE           | LOX         | LA         | 295          | 171          | (d4) 9-HODE.IS         | 15.93                | 1.33961         | 0.0002                | 22.22                 |
| 9-oxoODE         | LOX         | LA         | 293          | 185          | (d7) 5-oxoETE.IS       | 16.26                | 0.95769         | 0.012                 | 22.22                 |
| 13-HODE          | LOX         | LA         | 295          | 195          | (d4) 13-HODE.IS        | 15.78                | 3.34877         | 0.0002                | 22.22                 |
| 13-oxoODE        | LOX         | LA         | 293          | 167          | (d7) 5-oxoETE.IS       | 15.95                | 0.65942         | 0.012                 | 22.22                 |

|                    |           |      |     |     |                        |       |          |         |       |
|--------------------|-----------|------|-----|-----|------------------------|-------|----------|---------|-------|
| 9,10,13-triHOME    | LOX/CYP-e | LA   | 329 | 171 | (d4) 9,10 diHOME.IS    | 7.44  | 39.48725 | 0.0002  | 22.22 |
| 9,12,13-triHOME    | LOX/CYP-e | LA   | 329 | 211 | (d4) 12,13 diHOME.IS   | 7.38  | 61.41712 | 0.0002  | 22.22 |
| 13-HOTrE- $\gamma$ | LOX       | GLA  | 293 | 193 | (d4) 13-HODE.IS        | 14.88 | 3.26494  | 0.0034  | 22.22 |
| 8-HETrE            | LOX       | DGLA | 321 | 157 | (d8) 5-HETE.IS         | 17.07 | 1.87458  | 0.0009  | 22.22 |
| 15-HETrE           | LOX       | DGLA | 321 | 221 | (d8) 15-HETE.IS        | 16.7  | 3.79631  | 0.0009  | 22.22 |
| 5,6-DiHETrE        | CYP-e     | AA   | 337 | 145 | (d11) 8,9 DiHETrE.IS   | 15.55 | 1.78532  | 0.0034  | 22.22 |
| 8,9-DiHETrE        | CYP-e     | AA   | 337 | 127 | (d11) 8,9 DiHETrE.IS   | 14.85 | 1.77545  | 0.0034  | 22.22 |
| 11,12-DiHETrE      | CYP-e     | AA   | 337 | 167 | (d11) 11,12 DiHETrE.IS | 14.27 | 9.12136  | 0.0034  | 22.22 |
| 14,15-DiHETrE      | CYP-e     | AA   | 337 | 207 | (d11) 14,15 DiHETrE.IS | 13.56 | 8.93326  | 0.00028 | 22.22 |
| 12,13-EpODE        | CYP-e     | ALA  | 293 | 183 | (d4) 12,13 diHOME.IS   | 16.17 | 21.70636 | 0.0009  | 22.22 |
| 12,13-diHODE       | CYP-e     | ALA  | 311 | 183 | (d4) 12,13 diHOME.IS   | 11.24 | 34.86462 | 0.00028 | 22.22 |
| 16,17-DiHDoPE      | CYP-e     | DHA  | 361 | 233 | (d11) 14,15 DiHETrE.IS | 13.93 | 6.23301  | 0.00098 | 22.22 |
| 19,20-EpDoPE       | CYP-e     | DHA  | 343 | 241 | (d11) 14,15 DiHETrE.IS | 16.87 | 1.10022  | 0.012   | 22.22 |
| 19,20-DiHDoPE      | CYP-e     | DHA  | 361 | 229 | (d11) 14,15 DiHETrE.IS | 13.35 | 0.91613  | 0.012   | 22.22 |
| 9,10-EpOME         | CYP-e     | LA   | 295 | 171 | (d4) 9,10 diHOME.IS    | 17.35 | 37.33091 | 0.0009  | 22.22 |
| 9,10-diHOME        | CYP-e     | LA   | 313 | 201 | (d4) 9,10 diHOME.IS    | 13.24 | 79.72576 | 0.0009  | 22.22 |
| 12,13-EpOME        | CYP-e     | LA   | 295 | 195 | (d4) 12,13 diHOME.IS   | 17.17 | 22.85861 | 0.0034  | 22.22 |
| 12,13-diHOME       | CYP-e     | LA   | 313 | 183 | (d4) 12,13 diHOME.IS   | 12.71 | 34.6768  | 0.00028 | 22.22 |
| 16-HETE            | CYP-h     | AA   | 319 | 189 | (d8) 15-HETE.IS        | 15.5  | 0.72228  | 0.0009  | 22.22 |
| 17-HETE            | CYP-h     | AA   | 319 | 247 | (d8) 15-HETE.IS        | 15.4  | 2.73902  | 0.0034  | 22.22 |
| 18-HETE            | CYP-h     | AA   | 319 | 261 | (d6) 20-HETE.IS        | 15.26 | 2.58404  | 0.0034  | 22.22 |
| 19-HETE            | CYP-h     | AA   | 319 | 231 | (d6) 20-HETE.IS        | 14.88 | 0.17759  | 0.148   | 22.22 |
| 20-HETE            | CYP-h     | AA   | 319 | 245 | (d6) 20-HETE.IS        | 15.01 | 0.32666  | 0.0034  | 22.22 |
| 20-COOH-AA         | CYP-h     | AA   | 333 | 271 | (d5) EPA.IS            | 14.41 | 0.64699  | 0.012   | 22.22 |
| 18-HEPE            | CYP-h     | EPA  | 317 | 215 | (d8) 15-HETE.IS        | 14.49 | 1.1901   | 0.003   | 22.22 |
| 20-HDoHE           | CYP-h     | DHA  | 343 | 241 | (d6) 20-HETE.IS        | 15.7  | 0.8816   | 0.012   | 22.22 |

**Abbreviations:** AA: Arachidonic acid, ALA: Alpha linoleic acid, COX: Cyclooxygenase, CYP-e: Cytochrome P450 epoxygenase, CYP-h: Cytochrome P450 hydroxylase, DGLA: Dihomo gamma-linoleic acid, DHA: Docosahexaenoic acid, DiHDPE: Dihydroxydocosapentaenoic acid, DiHETE: Dihydroxyeicosatetraenoic acid, DiHETrE: Dihydroxy-eicosatrienoic acid, DPA: Docosapentaenoic acid, EPA: Eicosapentaenoic acid, EpDPE: Epoxydocosapentaenoic acid, EpODE: Epoxy-octadecadienoic acid, EpOME: Epoxy-octadecenoic acid, GLA: Gamma-linolenic acid, HDoHE: Hydroxy-docosahexaenoic acid, HEPE: Hydroxyeicosapentaenoic acid, HETE: Hydroxyeicosatetraenoic acid, HETrE: Hydroxyeicosatrienoic acid, HODE: Hydroxyoctadecadienoic acid, HOTrE: Hydroxy-octadecatrienoic acid, LA: Linoleic acid, LLOD: Lower limit of detection, LOX: Lipoxygenase, MPO: Myeloperoxidase, non-enz: Non-enzymatic oxidation, Oxo-ETE: Oxo-eicosatetraenoic acid, OxoODE: Oxo-octadecadienoic acid, OxoOTrE: Oxo-octadecatrienoic acid, PG: Prostaglandin, TriHOME: Trihydroxy-octadecenoic acid, ULOD: Upper limit of detection.

**Table S2. All quantified oxylipins in STEMI groups during I/R.**

| Compounds        | FA   | Pathway            | Isch (nM)  | R-2h(nM)    | R-24h(nM)     | R-48h(nM)     | R-30d(nM)     |
|------------------|------|--------------------|------------|-------------|---------------|---------------|---------------|
| 11,12 DiHETrE    | AA   | CYP-e              | 0.32±0.04  | 0.35±0.05   | 0.23±0.03     | 0.25±0.03     | 0.33±0.02     |
| 14,15 DiHETrE    | AA   | CYP-e              | 0.39±0.05  | 0.40±0.05   | 0.24±0.03     | 0.23±0.02 b   | 0.33±0.02     |
| 5,6 DiHETrE      | AA   | CYP-e              | 0.20±0.03  | 0.19±0.03   | 0.08±0.01 a,b | 0.08±0.01 a,b | 0.11±0.01     |
| 8,9 DiHETrE      | AA   | CYP-e              | 0.19±0.03  | 0.20±0.04   | 0.10±0.01     | 0.09±0.01 b   | 0.13±0.01     |
| 16-HETE          | AA   | CYP-h              | 0.29±0.03  | 0.27±0.03   | 0.20±0.02     | 0.20±0.02     | 0.33±0.03     |
| 18-HETE          | AA   | CYP-h              | 0.11±0.02  | 0.15±0.03   | 0.04±0.01 b   | 0.03±0.01 b   | 0.05±0.01 b   |
| 20-COOH-AA       | AA   | CYP-h              | 60.69±7.59 | 73.59±11.27 | 46.92±6.28    | 50.57±5.86    | 65.58±11.03   |
| 20-HETE          | AA   | CYP-h              | 0.87±0.14  | 0.69±0.09   | 0.39±0.05 a   | 0.38±0.05 a   | 0.54±0.13     |
| 12-HETE          | AA   | LOX                | 0.75±0.30  | 0.52±0.16   | 0.46±0.14     | 0.53±0.16     | 0.12±0.07 a   |
| 5-HETE           | AA   | LOX                | 3.95±0.92  | 2.51±0.25   | 1.33±0.19 a   | 1.44±0.18 a   | 1.21±0.21 a   |
| 5-oxoETE         | AA   | LOX                | 0.10±0.01  | 0.07±0.01   | 0.03±0.007 a  | 0.03±0.01 a   | 0.05±0.01     |
| 8-HETE           | AA   | LOX                | 1.00±0.15  | 0.70±0.07   | 0.57±0.06 a   | 0.54±0.06 a   | 0.62±0.14     |
| tetranor 12-HETE | AA   | LOX                | 0.47±0.07  | 0.65±0.10   | 0.38±0.05 b   | 0.29±0.04 b   | 0.38±0.04     |
| 15-HETE          | AA   | LOX/COX            | 1.61±0.32  | 1.15±0.14   | 0.8±0.11 a    | 0.8±0.09 a    | 0.58±0.07 a   |
| 11-HETE          | AA   | LOX/COX/non-enzyme | 0.44±0.12  | 0.25±0.05   | 0.16±0.04 a   | 0.15±0.04 a   | 0.13±0.02 a   |
| 9-HETE           | AA   | LOX/non-enz        | 0.30±0.20  | 0.10±0.06   | 0.10±0.05     | 0.12±0.06     | 0.27±0.13     |
| 15-oxoETE        | AA   | LOX                | 0.06±0.01  | 0.05±0.01   | 0.02±0.00 a   | 0.03±0.00 a   | 0.02±0.01 a   |
| 12,13 diHODE     | ALA  | CYP-e              | 0.16±0.05  | 0.1±0.01    | 0.09±0.01     | 0.13±0.03     | 0.17±0.02     |
| 12,13 EpODE      | ALA  | CYP-e              | 0.07±0.01  | 0.09±0.01   | 0.06±0.01     | 0.08±0.03     | 0.07±0.01     |
| 9 oxoOTrE        | ALA  | LOX                | 0.28±0.03  | 0.28±0.04   | 0.10±0.02 a,b | 0.10±0.03 a,b | 0.09±0.02 a,b |
| 9-HOTrE          | ALA  | LOX                | 5.29±0.71  | 4.59±0.71   | 1.84±0.22 a,b | 1.84±0.29 a,b | 2.32±0.34 a,b |
| 15-HETrE         | DGLA | LOX                | 0.31±0.06  | 0.21±0.03   | 0.09±0.01 a   | 0.12±0.02 a   | 0.10±0.01 a   |
| 8-HETrE          | DGLA | LOX                | 0.26±0.06  | 0.17±0.02   | 0.07±0.01 a   | 0.08±0.01 a   | 0.09±0.01 a   |
| 16,17 DiHDPE     | DHA  | CYP-e              | 0.04±0.01  | 0.04±0.01   | 0.03±0.00     | 0.03±0.00     | 0.04±0.01     |
| 16,17 EpDPE      | DHA  | CYP-e              | 0.03±0.02  | 0.03±0.02   | 0.01±0.01     | 0.01±0.01     | 0.06±0.06     |
| 19,20 DiHDPE     | DHA  | CYP-e              | 1.59±0.17  | 1.72±0.26   | 0.93±0.12 a,b | 0.89±0.11 a,b | 0.83±0.07 a,b |
| 19,20 EpDPE      | DHA  | CYP-e              | 0.02±0.01  | 0.01±0.01   | 0.001±0.00 a  | 0.002±0.00 a  | 0.008±0.01    |
| 20-HDoHE         | DHA  | CYP-h              | 0.52±0.11  | 0.35±0.06   | 0.21±0.05 a   | 0.17±0.05 a   | 0.14±0.05 a   |
| 10-HDoHE         | DHA  | LOX                | 0.18±0.04  | 0.08±0.01   | 0.08±0.03     | 0.05±0.01 a   | 0.08±0.02     |
| 14-HDoHE         | DHA  | LOX                | 0.63±0.12  | 0.35±0.05   | 0.28±0.05 a   | 0.26±0.05 a   | 0.22±0.04 a   |
| 16-HDoHE         | DHA  | LOX                | 0.27±0.06  | 0.16±0.03   | 0.12±0.03     | 0.09±0.02 a   | 0.09±0.02 a   |
| 17-HDoHE         | DHA  | LOX                | 1.17±0.23  | 0.84±0.14   | 0.58±0.10 a   | 0.53±0.09 a   | 0.27±0.15 a   |
| 17-keto DHA      | DHA  | LOX                | 5.30±0.92  | 4.27±0.63   | 6.74±1.25     | 6.36±1.09     | 3.87±0.70     |
| 4-HDoHE          | DHA  | LOX                | 2.67±0.45  | 1.68±0.23   | 0.82±0.09 a   | 0.96±0.09 a   | 0.80±0.16 a   |
| 7-HDoHE          | DHA  | LOX                | 0.57±0.07  | 0.37±0.06   | 0.25±0.04 a   | 0.26±0.05 a   | 0.20±0.08 a   |
| 8-HDoHE          | DHA  | LOX                | 0.86±0.16  | 0.69±0.11   | 0.30±0.09 a   | 0.28±0.07 a   | 0.26±0.11 a   |
| 11-HDoHE         | DHA  | LOX/non-enz        | 0.06±0.04  | 0±0.00      | 0.03±0.03     | 0.00±0.00     | 0.00±0.00     |
| 13-HDoHE         | DHA  | LOX/non-enz        | 0.24±0.10  | 0.06±0.03   | 0.08±0.04     | 0.02±0.02     | 0.00±0.00     |
| 17-keto DPA      | DPA  | LOX                | 4.55±0.82  | 4.08±0.49   | 4.08±0.99     | 3.97±0.77     | 2.89±0.85     |
| 14,15 diHETE     | EPA  | CYP-e              | 1.12±0.12  | 1.12±0.21   | 0.77±0.09     | 0.63±0.05     | 0.65±0.04     |
| 17,18 diHETE     | EPA  | CYP-e              | 2.67±0.26  | 2.63±0.39   | 1.6±0.19 a,b  | 1.57±0.18 a,b | 1.18±0.10 a,b |
| 18-HEPE          | EPA  | CYP-h              | 0.56±0.08  | 0.41±0.06   | 0.15±0.03 a,b | 0.09±0.01 a,b | 0.14±0.02 a,b |

|                 |     |           |            |            |                |                |               |
|-----------------|-----|-----------|------------|------------|----------------|----------------|---------------|
| 12-HEPE         | EPA | LOX       | 0.80±0.23  | 0.47±0.07  | 0.15±0.03 a    | 0.10±0.03 a    | 0.08±0.02 a   |
| 5-HEPE          | EPA | LOX       | 1.18±0.17  | 0.94±0.14  | 0.38±0.07 a,b  | 0.18±0.05 a,b  | 0.29±0.08 a,b |
| 15-HEPE         | EPA | LOX/COX   | 0.25±0.04  | 0.19±0.04  | 0.07±0.01 a    | 0.07±0.01a     | 0.08±0.01 a   |
| 13-HOTrE        | GLA | LOX       | 3.02±0.39  | 2.35±0.28  | 1.84±0.32 a    | 1.50±0.18 a    | 2.07±0.24     |
| 13-HOTrE-y      | GLA | LOX       | 0.47±0.06  | 0.34±0.05  | 0.11±0.02 a,b  | 0.10±0.01 a,b  | 0.19±0.03 a   |
| 9,10 diHOME     | LA  | CYP-e     | 3.59±0.84  | 3.05±0.49  | 2.86±0.91      | 3.93±1.86      | 3.21±0.40     |
| 12,13 EpOME     | LA  | CYP-e     | 1.84±0.16  | 2.16±0.20  | 1.32±0.16 b    | 1.38±0.25 b    | 1.12±0.13 b   |
| 12,13 diHOME    | LA  | CYP-e     | 5.99±2.38  | 3.96±0.42  | 3.78±0.55      | 4.25±1.24      | 4.97±0.60     |
| 9,10 EpOME      | LA  | CYP-e     | 0.78±0.10  | 0.83±0.10  | 0.39±0.07      | 0.51±0.16      | 0.34±0.08 b   |
| 13-HODE         | LA  | LOX       | 27.48±3.60 | 23.23±2.84 | 14.82±2.03 a   | 14.19±1.98 a   | 13.63±1.19 a  |
| 13-oxoODE       | LA  | LOX       | 3.58±0.27  | 3.09±0.27  | 2.06±0.18 a,b  | 2.15±0.25 a,b  | 1.77±0.16 a,b |
| 9-HODE          | LA  | LOX       | 31.68±3.61 | 28.23±3.75 | 13.18±1.62 a,b | 13.41±1.97 a,b | 12.59±1.4 a,b |
| 9-oxoODE        | LA  | LOX       | 4.05±0.32  | 4.12±0.42  | 1.87±0.24 a,b  | 2.05±0.27 a,b  | 1.5±0.20 a,b  |
| 9,10,13 triHOME | LA  | LOX/CYP-e | 11.83±0.98 | 9.01±0.85  | 6.83±0.67 a    | 7.00±0.61 a    | 5.87±0.70 a   |
| 9,12,13 triHOME | LA  | LOX/CYP-e | 3.58±0.37  | 2.74±0.24  | 2.43±0.27      | 2.31±0.22 a    | 2.59±0.31     |

Values are means ± SEM. a Significant difference from Isch, b Significant difference from R-2h (One way analysis of variance (ANOVA) with a post-hoc Tukey test for multiple comparisons was used to determine statistical significance between study groups, (p<0.05). (Isch, n=45), (R-2h, n=42), (R-24h, n=442), (R-48h, n=43), (R-30d, n=29), Control n=44). Abbreviations: AA: Arachidonic acid, ALA: Alpha-linoleic acid, COX: Cyclooxygenase, CYP-e: Cytochrome P450 epoxygenase, CYP-h: Cytochrome P450 hydroxylase, DGLA: Dihomo gamma-linoleic acid, DHA: Docosahexaenoic acid, DiHDPE: Dihydroxy-docosapentaenoic acid, DiHETE: Dihydroxy-eicosatetraenoic acid, DiHETrE: Dihydroxy-eicosatrienoic acid, DPA: Docosapentaenoic acid, EPA: Eicosapentaenoic acid, EpDPE: Epoxy-docosapentaenoic acid, EpODE: Epoxy-octadecadienoic acid, EpOME: Epoxy-octadecenoic acid, GLA: Gamma-linoleic acid, HDoHE: Hydroxy-docosahexaenoic acid, HEPE: Hydroxy-eicosapentaenoic acid, HETE: Hydroxy-eicosatetraenoic acid, HETrE: Hydroxy-eicosatrienoic acid, HODE: Hydroxy-octadecadienoic acid, HOTrE: Hydroxy-octadecatrienoic acid, LA: Linoleic acid, LOX: Lipoxigenase, non-enz: Non-enzymatic oxidation, Oxo-ETE: Oxo-eicosatetraenoic acid, OxoODE: Oxo-octadecadienoic acid, OxoOTrE: Oxo-octadecatrienoic acid, PG: Prostaglandin, TriHOME: Trihydroxy-octadecenoic acid.

## Overall study design

|                        |                                                                                                                                                                                                     |                                         |                           |
|------------------------|-----------------------------------------------------------------------------------------------------------------------------------------------------------------------------------------------------|-----------------------------------------|---------------------------|
| Title of the study     | Impact of reperfusion on plasma oxylipins in ST-segment Elevation Myocardial Infarction                                                                                                             |                                         |                           |
| Document creation date | 11/20/2023                                                                                                                                                                                          | Corresponding Email                     | amir.ravandi@umanitoba.ca |
| Principle investigator | Amir Ravandi                                                                                                                                                                                        | Is the workflow targeted or untargeted? | Targeted                  |
| Institution            | Precision Cardiovascular Medicine Group; St. Boniface Hospital, Albrechtsen Research Centre, 2Department of Physiology and Pathophysiology, Rady Faculty of Health Sciences, University of Manitoba | Clinical                                | Yes                       |

## Lipid extraction

|                   |                        |                                                 |               |
|-------------------|------------------------|-------------------------------------------------|---------------|
| Extraction method | Solid-Phase Extraction | Solid-Phase Extraction                          | Reverse-Phase |
| pH adjustment     | Hydrochloric acid      | Were internal standards added prior extraction? | Yes           |

## Analytical platform

|                                 |                                |                                                                        |                |
|---------------------------------|--------------------------------|------------------------------------------------------------------------|----------------|
| Which solvents were used        | water/acetonitrile/acetic acid | Ion source                                                             | ESI            |
| Number of separation dimensions | One dimension                  | MS Level                                                               | MS2            |
| Separation type 1               | LC                             | Mass window for precursor ion isolation (in Da total isolation window) | 1              |
| Separation mode 1 (liquid)      | RP                             | Mass resolution for detected ion at MS2                                | Low resolution |
| Detector                        | Mass spectrometer              | Resolution at MS2                                                      | Low            |
| MS type                         | QQQ                            | Was/Were additional dimension/techniques used                          | No             |
| MS vendor                       | SCIEX                          |                                                                        |                |

## Quality control

|                |                                   |                   |             |
|----------------|-----------------------------------|-------------------|-------------|
| Blanks         | Yes                               | Quality control   | Yes         |
| Type of Blanks | Extraction blank, Injection blank | Type of QC sample | Sample pool |

## Method qualification and validation

|                                                      |     |                     |      |
|------------------------------------------------------|-----|---------------------|------|
| Method validation                                    | Yes | Precision           | No   |
| Lipid recovery                                       | No  | Accuracy            | Yes  |
| Dynamic quantification range                         | Yes | Guidelines followed | None |
| Limit of quantitation (LOQ)/Limit of detection (LOD) | Yes |                     |      |

## Reporting

|                                                 |                      |                     |                      |
|-------------------------------------------------|----------------------|---------------------|----------------------|
| Are reported raw data uploaded into repository? | Available on request | Raw data upload     | Available on request |
| Are metadata available?                         | No                   | Additional comments | -                    |

## Sample Descriptions

### Plasma Oxylipins / Human / Plasma

|                                      |        |                                      |      |
|--------------------------------------|--------|--------------------------------------|------|
| Provided information                 | -      | Additives                            | EDTA |
| Temperature handling original sample | 4-8 °C | Were samples stored under inert gas? | No   |
| Instant sample preparation           | Yes    | Additional preservation methods      | No   |
| Storage temperature                  | -80 °C | Biobank samples                      | No   |
